# Supplementary material for: Highly oriented lamellar polyaniline films via electrochemical polymerization and post-growth annealing
Source: Royal Society of Chemistry journal article supplement (doi:10.1039/c6ra27538a), 2017-01-01
Supplement: c6ra27538a1.pdf [file c6ra27538a1.pdf]

Electronic Supplementary Material (ESI) for RSC Advances.  
This journal is © The Royal Society of Chemistry 2017

## Electronic Supplementary Information

### **Highly Oriented Lamellar Polyaniline Films via Electrochemical Polymerization and Post-Growth Annealing**

Suna Fan,<sup>a,b</sup> Renwei Liu,<sup>a,b</sup> Weitao Zheng<sup>\*a</sup> and Ming Li<sup>\*b</sup>

<sup>a</sup> Key Laboratory of Automobile Materials of MOE, State Key Laboratory of Automotive Simulation and Control, and Department of Materials Science, Jilin University, Changchun, Jilin 130000, China.

<sup>b</sup> Beijing National Laboratory for Condensed Matter Physics, Institute of Physics and School of Physical Sciences, University of Chinese Academy of Sciences, Beijing 100190, China  
Chinese Academy of Sciences, Beijing, China

\*Corresponding authors: mingli@iphy.ac.cn or wtzheng@jlu.edu.cn

**DSC thermogram:** Fig. S11 shows the DSC thermogram of the as-prepared PANI film. It exhibits the first endothermic peaks between 70~120 °C, which could be assigned to the release of water. The second endothermic transition observed between 170~200 °C is attributed to the loss of low-molecular-weight oligomers and dopant, which is consistent with the TGA result shown in Fig. 5.

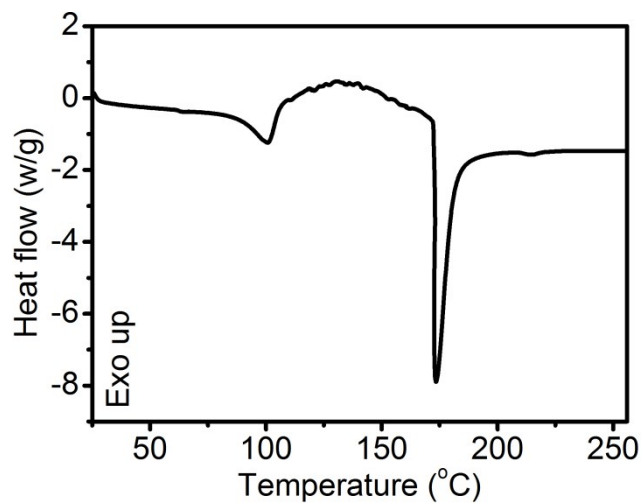

**Figure S11.** DSC thermogram of the as-prepared PANI film.
